# Supplementary material for: CD133 Antigen as a Potential Marker of Melanoma Stem Cells: In Vitro and In Vivo Studies
Source: Hindawi journal article supplement (doi:10.1155/2020/8810476), 2020-12-23

CD133+

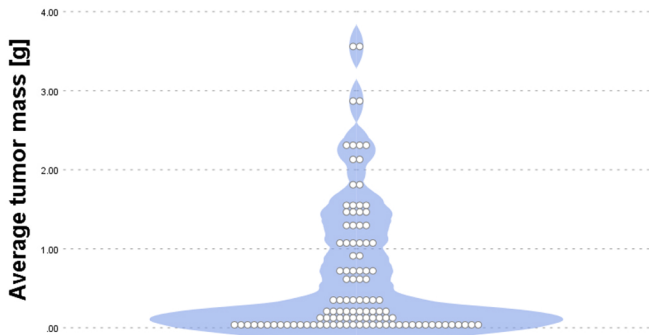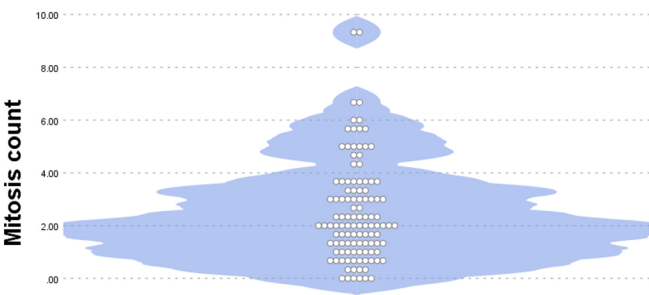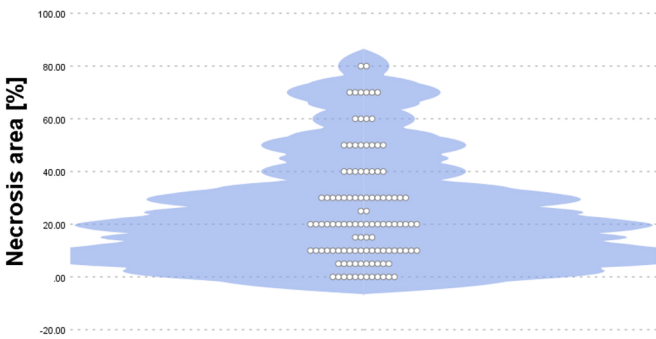

CD133-

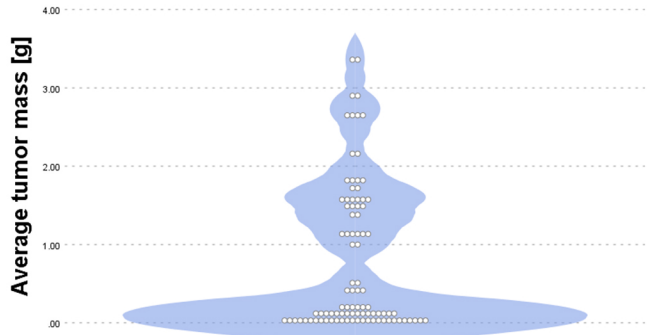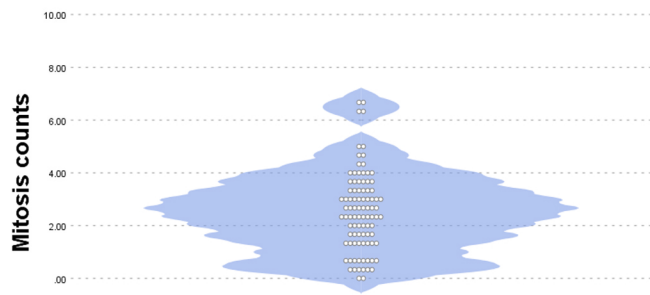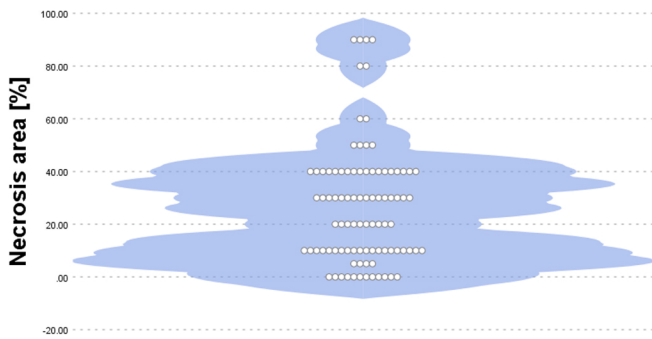

Supplement: f1 [file 8810476.f1.pdf]
