# Supplementary material for: CD133 Antigen as a Potential Marker of Melanoma Stem Cells: In Vitro and In Vivo Studies
Source: Hindawi journal article supplement (doi:10.1155/2020/8810476), 2020-12-23

CD133+

CD133-

100

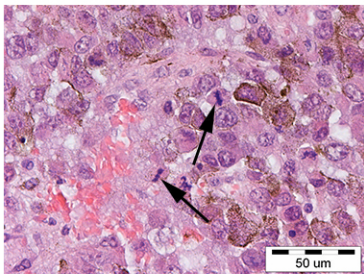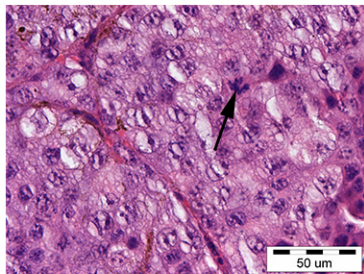

1000

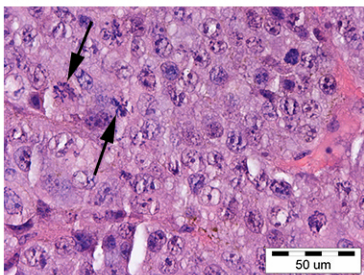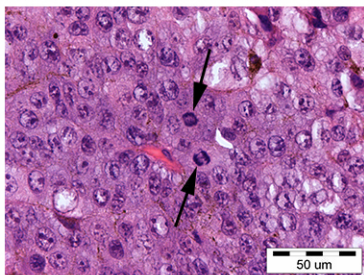

10 000

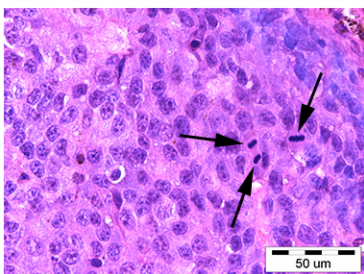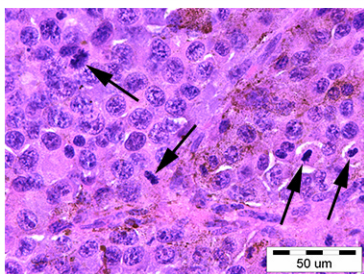

Supplement: f2 [file 8810476.f2.pdf]
